# Supplementary material
Source: ML conference proceedings conference paper supplement (https://proceedings.neurips.cc/paper_files/paper/2022/hash/71ec377d5df1fc61ee7770857820519b-Abstract.html)
Supplement: Supplementary file 1 [file 71ec377d5df1fc61ee7770857820519b-Supplemental-Conference.zip]

Archive with 2 entries (2 files):
- NIPS2022_JAT_Appendix_final.pdf
- JAT Code.zip
